# Supplementary material for: Anisotropic lens-shaped mesoporous carbon from interfacially perpendicular self-assembly for potassium-ion batteries
Source: Royal Society of Chemistry journal article supplement (doi:10.1039/d3cc04344d), 2023-12-15
Supplement: d3cc04344d1.pdf [file d3cc04344d1.pdf]

< Electronic Supplementary Information >

## Anisotropic Lens-shaped Mesoporous Carbon from Interfacially Perpendicular Self-Assembly for Potassium-Ion Battery

Dongyoon Woo,<sup>‡</sup> Minkyong Ban,<sup>‡</sup> Jisung Lee, Cheol-Young Park, Jinuk Kim,

Seongseop Kim,<sup>\*</sup> and Jinwoo Lee<sup>\*</sup>

### Chemicals

Homo-poly(methyl methacrylate) (hPMMA) (996 kg mol<sup>-1</sup>), aluminum *sec*-butoxide (Al(OBu<sup>s</sup>)<sub>3</sub>), (3-glycidyloxypropyl-)trimethoxysilane (Glymo), poly(melamine-co-formaldehyde) (melamine–formaldehyde resin) (M<sub>n</sub> = ~432 g mol<sup>-1</sup>, 84 wt% in 1-butanol) were purchased from Sigma-Aldrich. Chloroform (CHCl<sub>3</sub>), tetrahydrofuran (THF), and concentrated HCl (35–37%) were purchased from Samchun (Korea). Phenol-formaldehyde resin (PF resin) was prepared by previous reported method.<sup>1</sup> Poly(ethylene oxide)-*block*-poly(styrene) (PEO-*b*-PS) was prepared by atomic transfer radical polymerization (ATRP).

### Experimental section

**Synthesis of aluminosilicate sol (AS sol).** 0.313 g of aluminum *sec*-butoxide, 2.703 of Glymo, and 0.011 g of KCl were mixed and 0.135 g of 0.01 M HCl was added dropwise in an ice bath. The mixture was stirred for 15 min at the ice bath, then stirred for another 15 min at room temperature. Then 0.765 g of 0.01 M HCl was added slowly for 10 min. After, stirring for 25 min, AS sol was obtained by filtration through a 0.2 μm PTFE syringe filter to remove KCl.

**Synthesis of lens-shaped nitrogen-doped mesoporous carbon (Lens-NMC).** 1.4g of

hPMMA. 0.2g of PEO-b-PS and 0.7g of AS sol, and 0.14 g of carbon precursor (PF and MF resin, 1:1 w/w) were dissolved in 15ml THF and 25 ml  $\text{CHCl}_3$ . After 2 h stirring, transparent solution was poured into the petri dish. Solution was evaporated at 50°C and then hPMMA/PEO-b-PS/AS/carbon precursor hybrids were annealed at 100 °C for overnight. The as-made hybrids were re-dissolved in THF and centrifuged to remove hPMMA matrix. Centrifuged hybrids were calcined at 900°C for 2 h under inert condition with heating rate of 1 °C min<sup>-1</sup>. To remove AS species, AS/N-doped carbon composite was immersed in HF solution (40-45% HF aqueous solution, DIW, and EtOH, 2:9:9 volume ratio) and washed with ethanol and distilled water and dried vacuum oven at 60°C over night.

**Synthesis of lens-shaped mesoporous carbon (Lens-MC).** Synthesis of Lens-MC was same with Lens-NMC except that only PF resin was dissolved in solvent as carbon precursor.

**Synthesis of bulk mesoporous carbon (BMC).** 0.15 g of PEO-b-PS and 0.164 g of RF resin were dissolved in 7ml of THF. 0.306ml of TEOS and 0.137 ml of 0.2M HCl were added to above solution dropwise. After stirring about 1 hour to get homogeneous solution, the mixture was poured into petri dish and evaporated at 50°C. After evaporation was finished, the film was further annealed at 100 °C for overnight. After annealing, the as-made film was carbonized at 900°C for 2 h under inert condition with heating rate of 1 °C min<sup>-1</sup>. To remove silica, the carbonized product was etched by HF solution (40-45% HF aqueous solution, DIW, and EtOH, 2:9:9 volume ratio) and washed with ethanol and distilled water, then dried under vacuum oven at 60°C over night.

**Material characterization.** Gel permeation chromatography (GPC; Waters) was carried out using THF as the eluent. The nanostructure was characterized by transmission electron microscopy (TEM, H-7650, Hitachi) in the Center for University-wide Research Facilities

(CURF) at Jeonbuk National University and scanning electron microscopy (SEM, S-4700 field emission SEM, Hitachi) at the Future Energy Convergence Core Center (FECC). The powder X-ray diffraction (XRD) patterns were obtained on a Rigaku SmartLab using Cu K $\alpha$ . X-ray photoelectron spectroscopy (XPS) was detected with ThermoFisher Scientific K-Alpha+. The nitrogen physisorption was analyzed at 77 K using Tristar II 3020 (Micromeritics Instrument Co.). The specific surface area was calculated by The Brunauer-Emmett-Teller (BET) method using adsorption data in a relative pressure range from 0 to 0.3. The pore size distribution was measured by the Horvath-Kawazoe method in the micropore region (< 2 nm) and the Barrett-Joyner-Halenda (BJH) method in the mesopore region (> 2 nm). Small angle X-ray scattering (SAXS) measurements were carried out on the 4C SAXS beamline at the Pohang Light Source II. Electroconductivity of manufactured carbon electrode was measured with 4-point probe method with CMT-100MP, AIT. Fourier transform infrared (FT-IR) spectroscopy was performed using a Thermo Fisher Scientific Nicolet iS50 instrument. The samples were prepared as pellets mixed with potassium bromide (KBr).

**Electrochemical Characterization.** For the half-cell test, K metal was used as the counter electrode, and Lens-NMC, Lens-MC, or BMC were used as the working electrode. BMC. To assess the performance of the half-cell, a configuration involving CR2032-type coin cells was employed., which were assembled in a glove box. A GF/F glass microfiber filter (Whatman, USA) was used as a separator. The electrolyte consisted of a 1 M potassium bis(fluorosulfonyl)imide (KFSI) dissolved in a 1:1 (v/v) mixture of ethylene carbonate (EC) and diethyl carbonate (DEC). The working electrode was prepared via typical slurry and casting methods. The slurry was formulated by blending 70 wt % Lens-NMC, Lens-MC or BMC, 20 wt % Super P, and 10 wt % poly(vinylidene fluoride) (PVDF) and then pasted on Cu

foil. The galvanostatic electrochemical test was conducted by a WBCS-3000 battery cycler (WonATech Co., Korea) in the potential range of 0.01 to 3 V (versus K/K<sup>+</sup>). Electrochemical impedance spectroscopy was conducted utilizing the potentiostat (Reference 600, Gamry Instruments, USA) with an amplitude of 5 mV, encompassing a frequency range from 105 to 0.001 Hz.

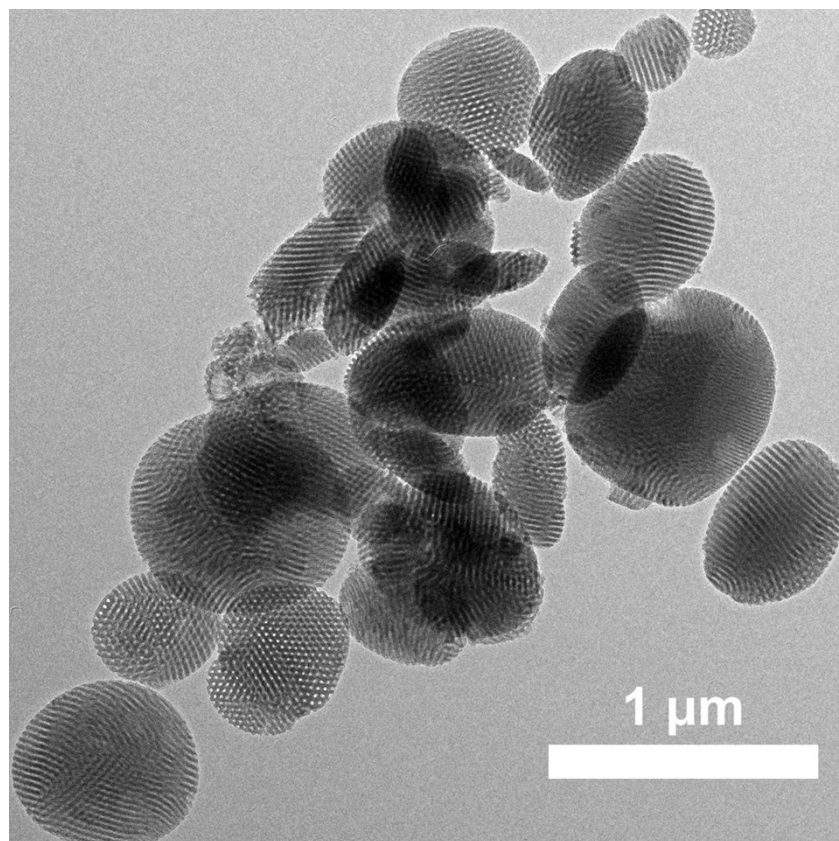

**Figure S1.** TEM image of Lens-NMC.

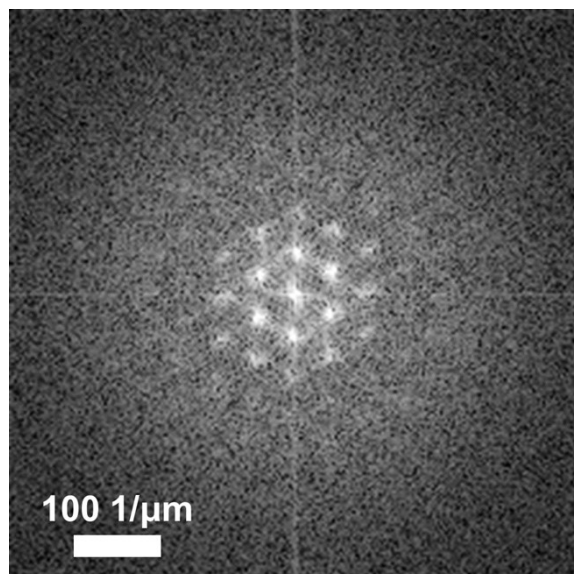

**Figure S2.** FFT diffractogram of Lens-NMC, obtained on parallel domain with pore axis.

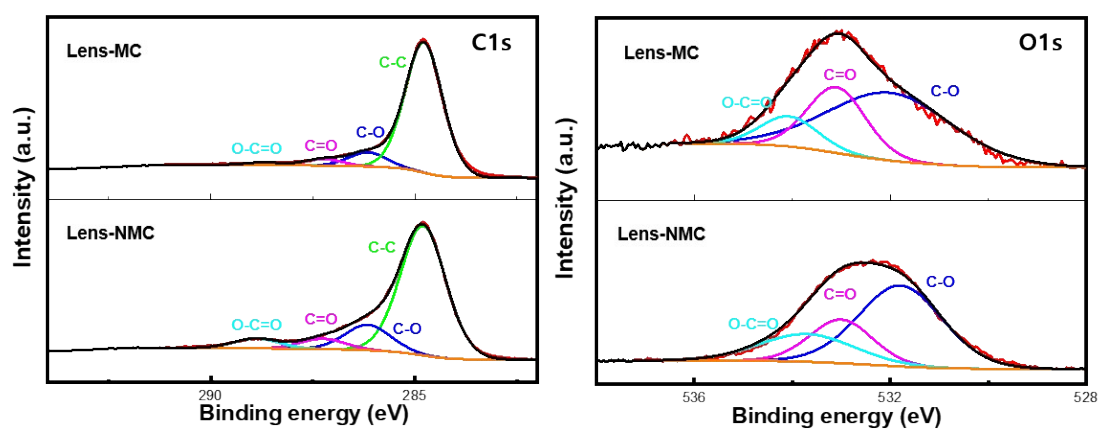

**Figure S3.** XPS C1s and O1s spectra of Lens-MC and Lens-NMC.

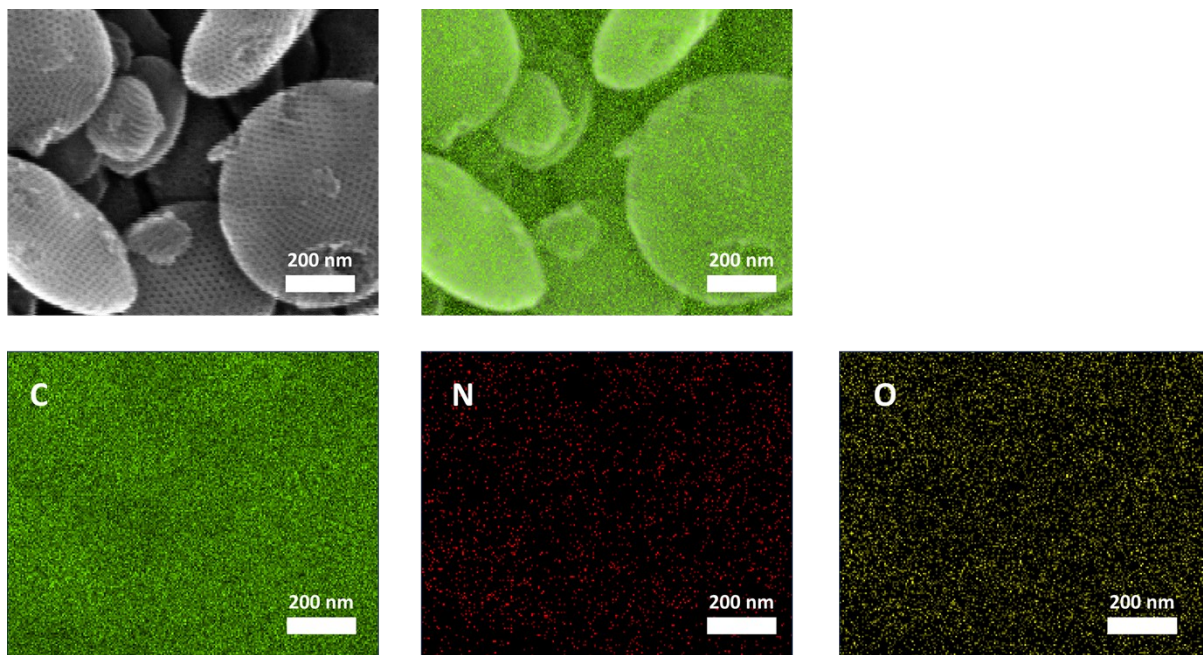

**Figure S4.** SEM images and corresponding EDX elemental mapping of Lens-NMC.

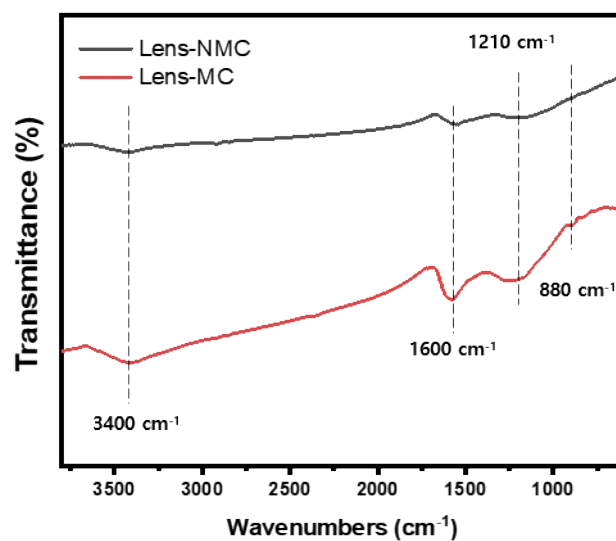

**Figure S5.** The FT-IR transmittance spectra of Lens-NMC and Lens-MC. A broad band around 3400  $\text{cm}^{-1}$  can be attributed to the stretching vibration of -OH groups, particularly those originating from the phenolic -OH groups present in PF resin. The stretching vibration of aromatic C-C bonds are revealed around 1600  $\text{cm}^{-1}$  while the stretching vibrations associated with the C-O bonds in the phenolic group are observed at approximately 1210  $\text{cm}^{-1}$ . Furthermore, the benzenoid ring substitution was appeared at around 880  $\text{cm}^{-1}$  in spectra.

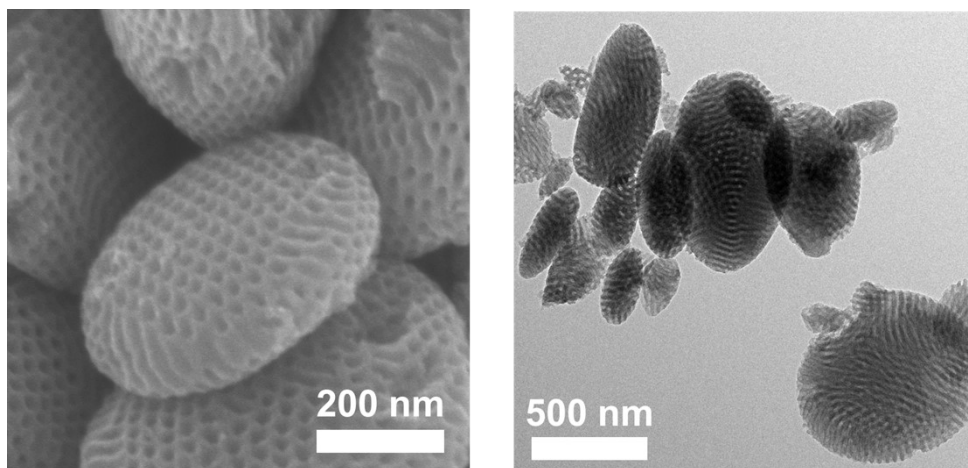

**Figure S6.** SEM (left) and TEM (right) image of Lens-MC.

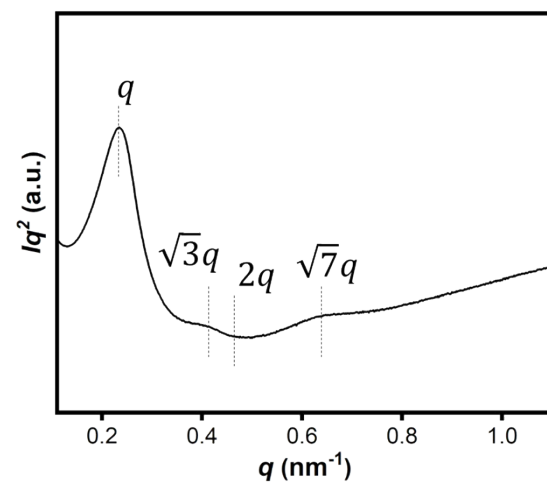

**Figure S7.** SAXS pattern of Lens-MC.

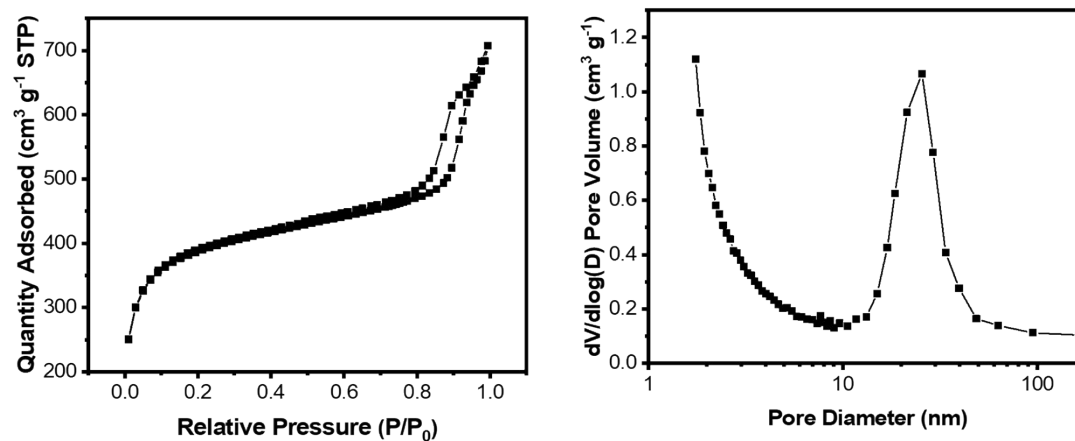

**Figure S8.**  $N_2$  physisorption isotherm (left) and pore size distribution (right) of Lens-MC.

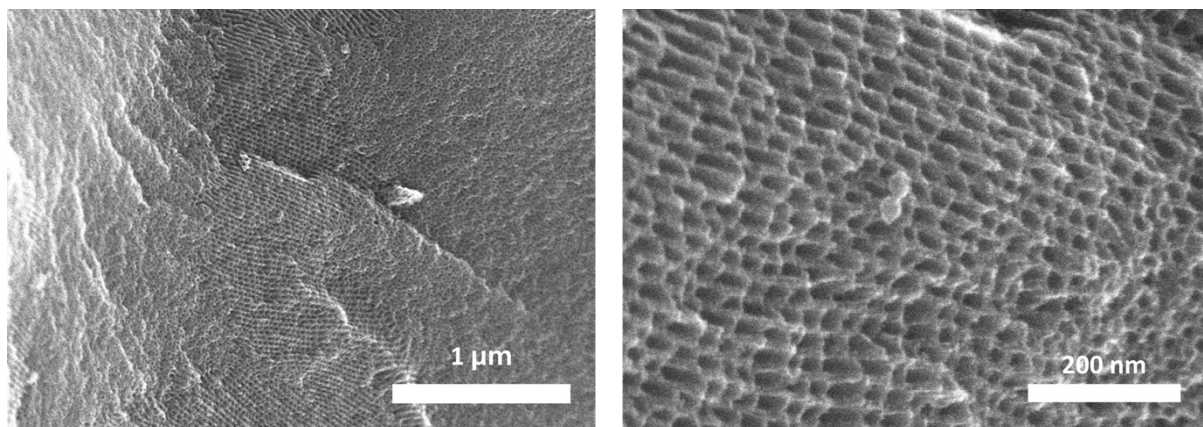

**Figure S9.** SEM images of BMC

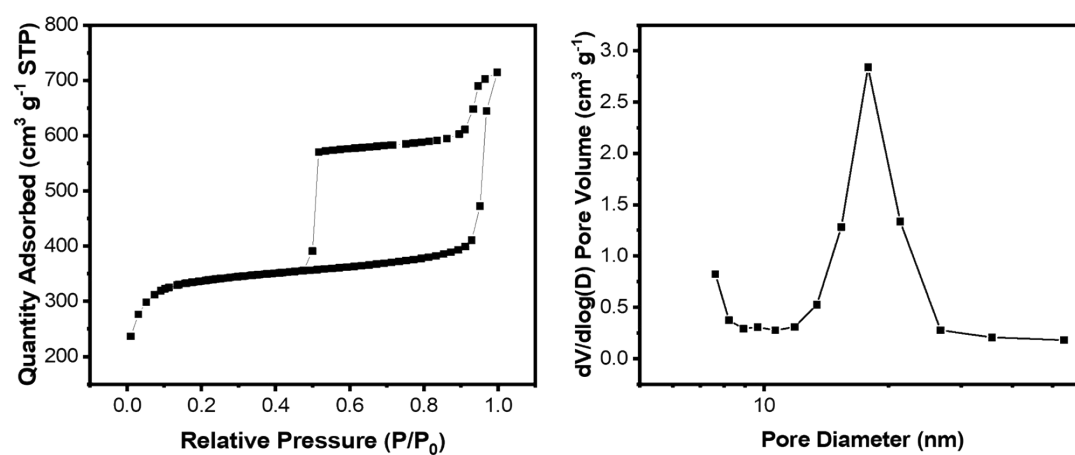

**Figure S10.**  $N_2$  physisorption isotherm (left) and pore size distribution (right) of BMC

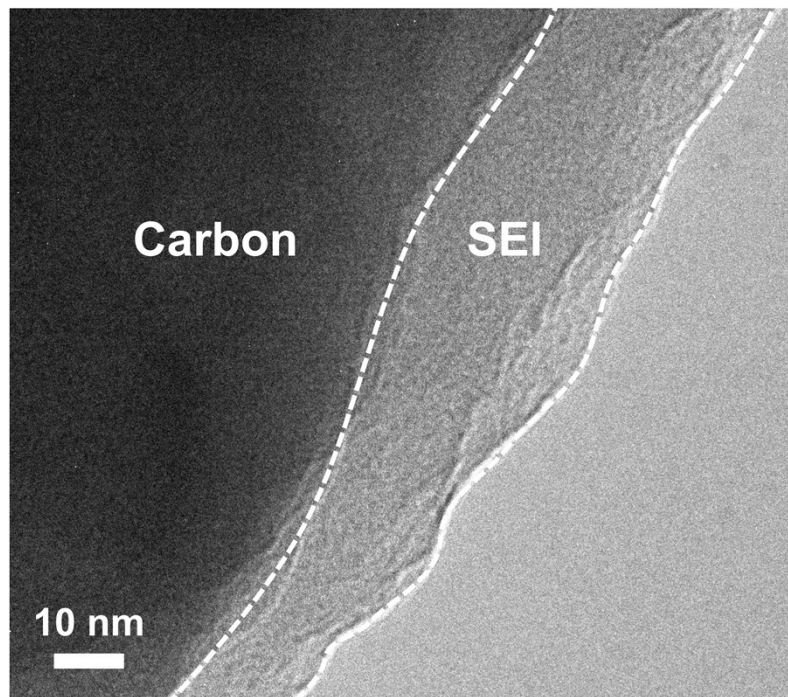

**Figure S11.** TEM images of Lens-NMC anode after first discharge to 0.01V.

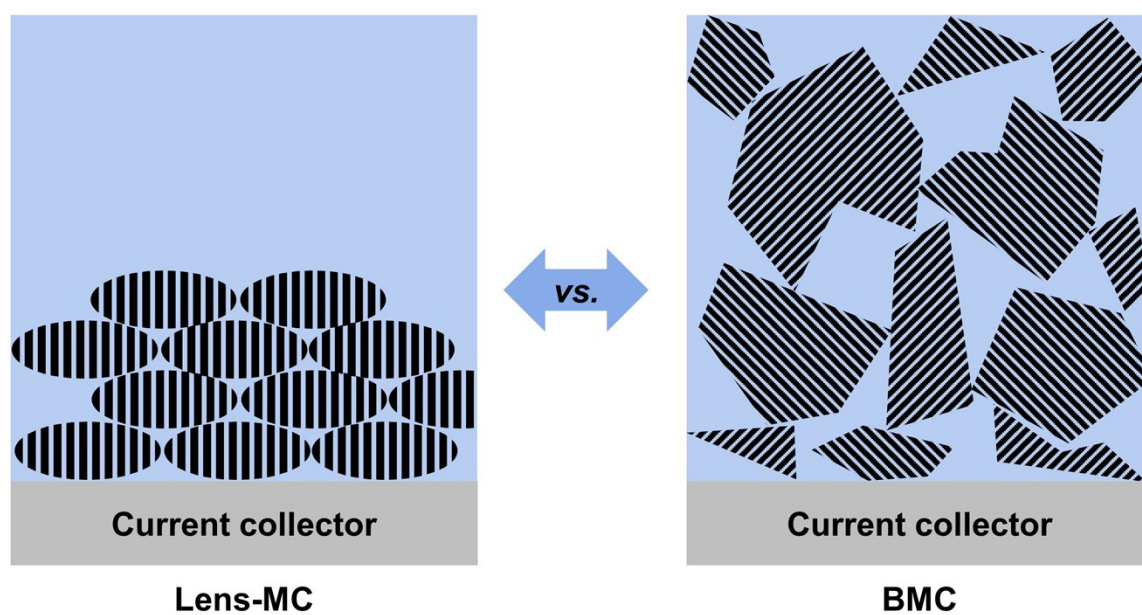

**Figure S12.** Schematic comparison of Lens-MC and BMC.

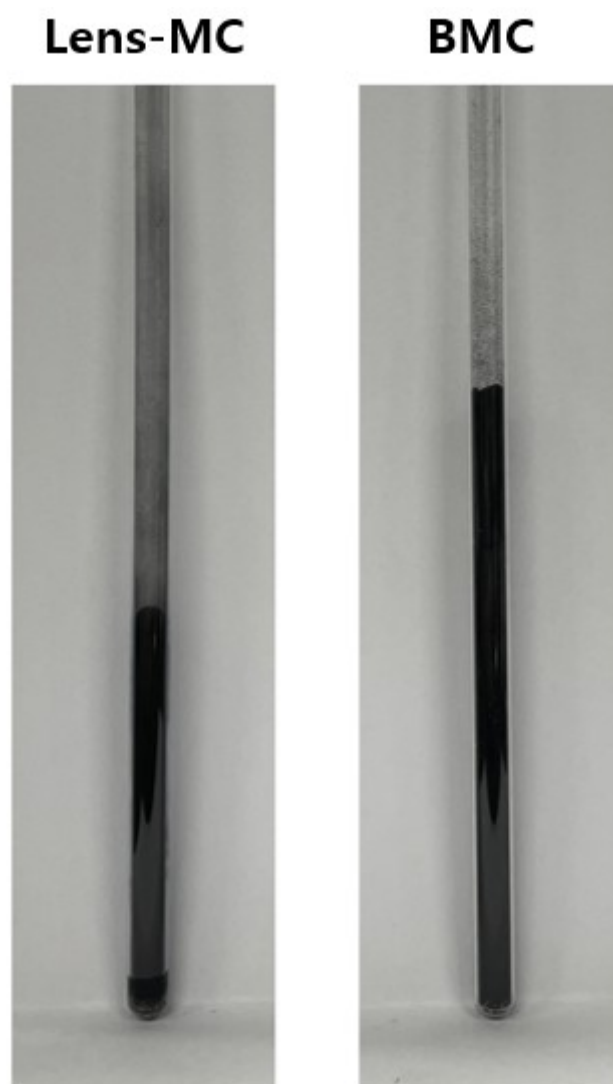

**Figure S13.** The comparison of tap densities of Lens-MC and BMC. 200 mg of each sample was filled in glass tubes with diameter of 5 mm.

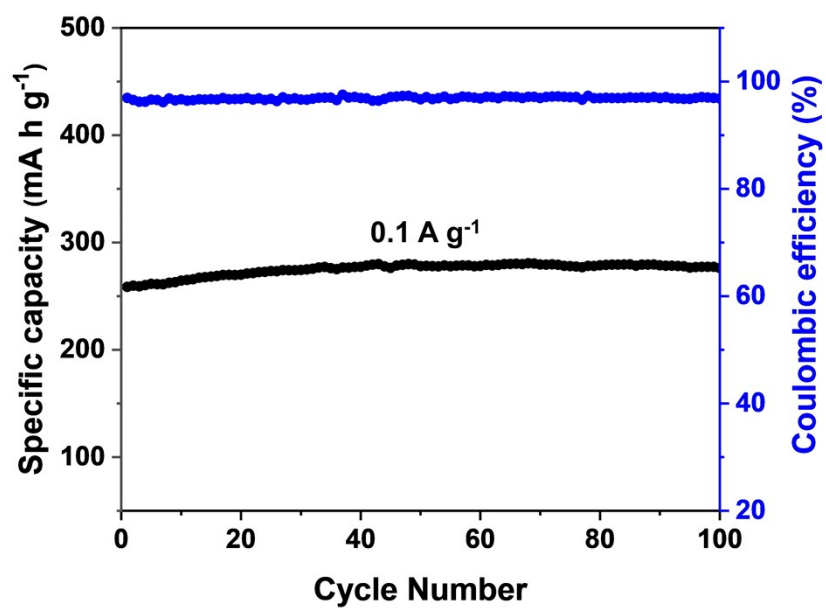

**Figure S14.** Cycling performance of Lens-NMC anode at 0.1 A g<sup>-1</sup> over 100 cycles.

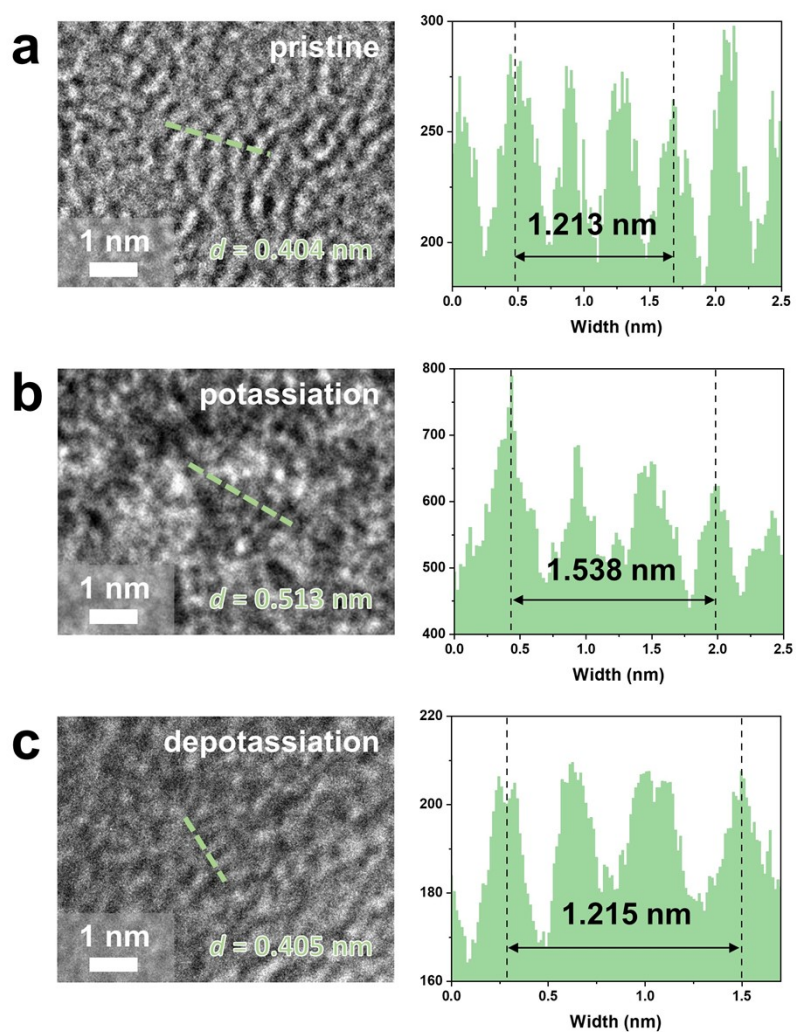

**Figure S15.** TEM images and corresponding interlayer spacing of (a) pristine, (b) potassiated, and (c) depotassiated Lens-NMC.

**Table S1.** Nitrogen physisorption isotherm analysis of Lens-NMC, Lens-MC and BMC.

| <b>Sample</b> | <b>Surface area (m<sup>2</sup> g<sup>-1</sup>)</b> | <b>Pore volume (cm<sup>3</sup> g<sup>-1</sup>)</b> | <b>Pore size (nm)</b> |
|---------------|----------------------------------------------------|----------------------------------------------------|-----------------------|
| Lens-NMC      | 1,367                                              | 1.20                                               | 25                    |
| Lens-MC       | 1,406                                              | 1.09                                               | 25                    |
| BMC           | 1,071                                              | 1.10                                               | 17                    |

**Table S2.** Element analysis of Lens-NMC and Lens-MC.

| <b>Element (at%)</b> | <b>Carbon</b> | <b>Hydrogen</b> | <b>Nitrogen</b> |
|----------------------|---------------|-----------------|-----------------|
| Lens-NMC             | 86.3          | 2.08            | 2.92            |
| Lens-MC              | 90.1          | 2.04            | 0.02            |

**Table S3.** Comparison of Lens-NMC electrode with reported carbonaceous anodes in KIBs at low and high current densities.

| Anode material                                       | Cyclability                                                                                                                                    |
|------------------------------------------------------|------------------------------------------------------------------------------------------------------------------------------------------------|
| Lens-NMC<br>(this work)                              | 276 mA h g <sup>-1</sup> @0.1 A g <sup>-1</sup><br>after 100 cycles<br>206 mA h g <sup>-1</sup> @1 A g <sup>-1</sup><br>after 2000 cycles      |
| 3D rGO aerogel <sup>2</sup>                          | 230 mA h g <sup>-1</sup> @0.093 A g <sup>-1</sup><br>after 100 cycles<br>125 mA h g <sup>-1</sup> @0.448 A g <sup>-1</sup><br>after 500 cycles |
| N-doped necklace-like<br>hollow carbon <sup>3</sup>  | 161 mA h g <sup>-1</sup> @1 A g <sup>-1</sup><br>after 1600 cycles                                                                             |
| N-doped soft carbon <sup>4</sup>                     | 165 mA h g <sup>-1</sup> @1 A g <sup>-1</sup><br>after 500 cycles                                                                              |
| Pitch derived soft<br>carbon <sup>5</sup>            | 278 mA h g <sup>-1</sup> @0.028 A g <sup>-1</sup><br>after 50 cycles<br>192 mA h g <sup>-1</sup> @0.28 A g <sup>-1</sup><br>after 1000 cycles  |
| Hard carbon sphere <sup>6</sup>                      | 264 mA h g <sup>-1</sup> @0.02 A g <sup>-1</sup><br>after 50 cycles                                                                            |
| Oxygen functionalized<br>hard carbon <sup>7</sup>    | 211.6 mA h g <sup>-1</sup> @0.05 A g <sup>-1</sup><br>after 200 cycles<br>90.2 mA h g <sup>-1</sup> @4 A g <sup>-1</sup><br>after 850 cycles   |
| Vertically aligned<br>Carbon aerogel <sup>8</sup>    | 151 mA h g <sup>-1</sup> @0.14 A g <sup>-1</sup><br>after 1000 cycles                                                                          |
| P, N dual-doped<br>hollow carbon sphere <sup>9</sup> | 250.1 mA h g <sup>-1</sup> @0.2 A g <sup>-1</sup><br>after 500 cycles<br>141.2 mA h g <sup>-1</sup> @1 A g <sup>-1</sup><br>after 5000 cycles  |
| Partially graphitic<br>hard carbon <sup>10</sup>     | 200 mA h g <sup>-1</sup> @0.1 A g <sup>-1</sup><br>after 100 cycles                                                                            |
| Porous carbon fiber <sup>11</sup>                    | 259 mA h g <sup>-1</sup> @0.05 A g <sup>-1</sup><br>after 80 cycles<br>149 mA h g <sup>-1</sup> @1 A g <sup>-1</sup><br>after 3300 cycles      |

**Table S4.** The fitted parameters and values of the model for Lens-NMC and Lens-MC anode.

| <b>Anode</b>    | <b>R<sub>s</sub><br/>(Ohm)</b> | <b>Q<sub>1</sub><br/>(F s<sup>-0.1686</sup>)</b> | <b>R<sub>f</sub><br/>(Ohm)</b> | <b>Q<sub>2</sub><br/>(F s<sup>-1</sup>)</b> | <b>R<sub>ct</sub><br/>(Ohm)</b> | <b>Z<sub>w</sub><br/>(Ohm s<sup>-0.5</sup>)</b> |
|-----------------|--------------------------------|--------------------------------------------------|--------------------------------|---------------------------------------------|---------------------------------|-------------------------------------------------|
| <b>Lens-NMC</b> | 2.123                          | $32.5 \times 10^{-6}$                            | 276.6                          | $0.296 \times 10^{-3}$                      | 0.6775                          | 220                                             |
| <b>Lens-MC</b>  | 2.391                          | $25.07 \times 10^{-6}$                           | 432.5                          | $1.76 \times 10^{-3}$                       | 2487                            | $0.6688 \times 10^{-27}$                        |

## Reference

- S1. S. Kim, M. Ju, J. Lee, J. Hwang and J. Lee, *J. Am. Chem. Soc.*, 2020, **142**, 9250-9257.
- S2. L. Y. Liu, Z. F. Lin, J. Y. Chane-Ching, H. Shao, P. L. Taberna and P. Simon, *Energy Storage Mater.*, 2019, **19**, 306-313.
- S3. W. X. Yang, J. H. Zhou, S. Wang, W. Y. Zhang, Z. C. Wang, F. Lv, K. Wang, Q. Sun and S. J. Guo, *Energy Environ. Sci.*, 2019, **12**, 1605-1612.
- S4. C. Liu, N. Xiao, H. J. Li, Q. Dong, Y. W. Wang, H. Q. Li, S. F. Wang, X. Y. Zhang and J. S. Qiu, *Chem. Eng. J.*, 2020, **382**, 121759.
- S5. Y. Liu, Y. X. Lu, Y. S. Xu, Q. S. Meng, J. C. Gao, Y. G. Sun, Y. S. Hu, B. B. Chang, C. T. Liu and A. M. Cao, *Adv. Mater.*, 2020, **32**, 2000505.
- S6. J. Xu, C. Y. Fan, M. Y. Ou, S. X. Sun, Y. Xu, Y. Liu, X. Wang, Q. Li, C. Fang and J. T. Han, *Chem. Mater.*, 2022, **34**, 4202-4211.
- S7. Z. Y. Liu, S. J. Wu, Y. Song, T. Yang, Z. H. Ma, X. D. Tian and Z. J. Liu, *ACS Appl. Mater. Interfaces*, 2022, **14**, 47674–47684.
- S8. J. Wang, Z. Xu, J. C. Eloi, M. M. Titirici and S. J. Eichhorn, *Adv. Funct. Mater.*, 2022, **32**, 2110862.
- S9. J. Y. Gao, G. R. Wang, W. T. Wang, L. Yu, B. Peng, A. El-Harairy, J. Li and G. Q. Zhang, *ACS Nano*, 2022, **16**, 6255-6265.
- S10. L. Zhong, W. L. Zhang, S. R. Sun, L. Zhao, W. B. Jian, X. He, Z. Y. Xing, Z. X. Shi, Y. A. Chen, H. N. Alshareef and X. Q. Qiu, *Adv. Funct. Mater.*, 2023, **33**, 2211872.
- S11. J. L. Sun, L. Ma, H. C. Sun, Y. H. Xu, J. L. Li, W. J. Mai and B. T. Liu, *Chem. Eng. J.*, 2023, **455**, 140902.
